# Supplementary material for: Nicotinic acid suppresses sebaceous lipogenesis of human sebocytes via activating hydroxycarboxylic acid receptor 2 (HCA2)
Source: J Cell Mol Med. 2019 Jul 5;23(9):6203–14. doi: 10.1111/jcmm.14505 (PMC6714165; doi:10.1111/jcmm.14505)
Supplement: Supplementary file 1 [file JCMM-23-6203-s001.pdf]

## **SUPPLEMENTARY DATA**

### **Nicotinic acid suppresses sebaceous lipogenesis of human sebocytes via activating hydroxycarboxylic acid receptor 2 (HCA<sub>2</sub>)**

**Arnold Markovics<sup>1</sup>, Kinga Fanni Tóth<sup>1</sup>, Katalin Eszter Sós<sup>1,2</sup>, József Magi<sup>1</sup>, Adrienn Gyöngyösi<sup>3</sup>, Zoltán Benyó<sup>4</sup>, Christos C. Zouboulis<sup>5</sup>, Tamás Bíró<sup>6,7,#,\*</sup>, Attila Oláh<sup>1#</sup>**

<sup>#</sup>These authors contributed equally.

<sup>1</sup>Department of Physiology, Faculty of Medicine, University of Debrecen, Debrecen, Hungary; <sup>2</sup>Laboratory of Cerebral Cortex Research, Institute of Experimental Medicine Hungarian Academy of Sciences, Budapest, Hungary; <sup>3</sup>Department of Immunology, Faculty of Medicine, University of Debrecen, Debrecen, Hungary; <sup>4</sup>Institute of Clinical Experimental Research, Semmelweis University, Budapest, Hungary; <sup>5</sup>Departments of Dermatology, Venereology, Allergology and Immunology, Dessau Medical Center, Brandenburg Medical School Theodor Fontane, Dessau, Germany; <sup>6</sup>DE-MTA “Lendület” Cellular Physiology Research Group, Department of Immunology, Faculty of Medicine, University of Debrecen, Debrecen, Hungary; <sup>7</sup>HCEMM Ltd., Szeged, Hungary

#### **\*CORRESPONDING AUTHOR:**

Tamás Bíró, MD, PhD, DSc; DE-MTA “Lendület” Cellular Physiology Research Group, Department of Immunology, Faculty of Medicine, University of Debrecen; Egyetem square 1. Debrecen, H-4032, Hungary; e-mail: [biro.tamas@med.unideb.hu](mailto:biro.tamas@med.unideb.hu); phone/FAX: +3652-417-159.

## SUPPLEMENTARY FIGURES

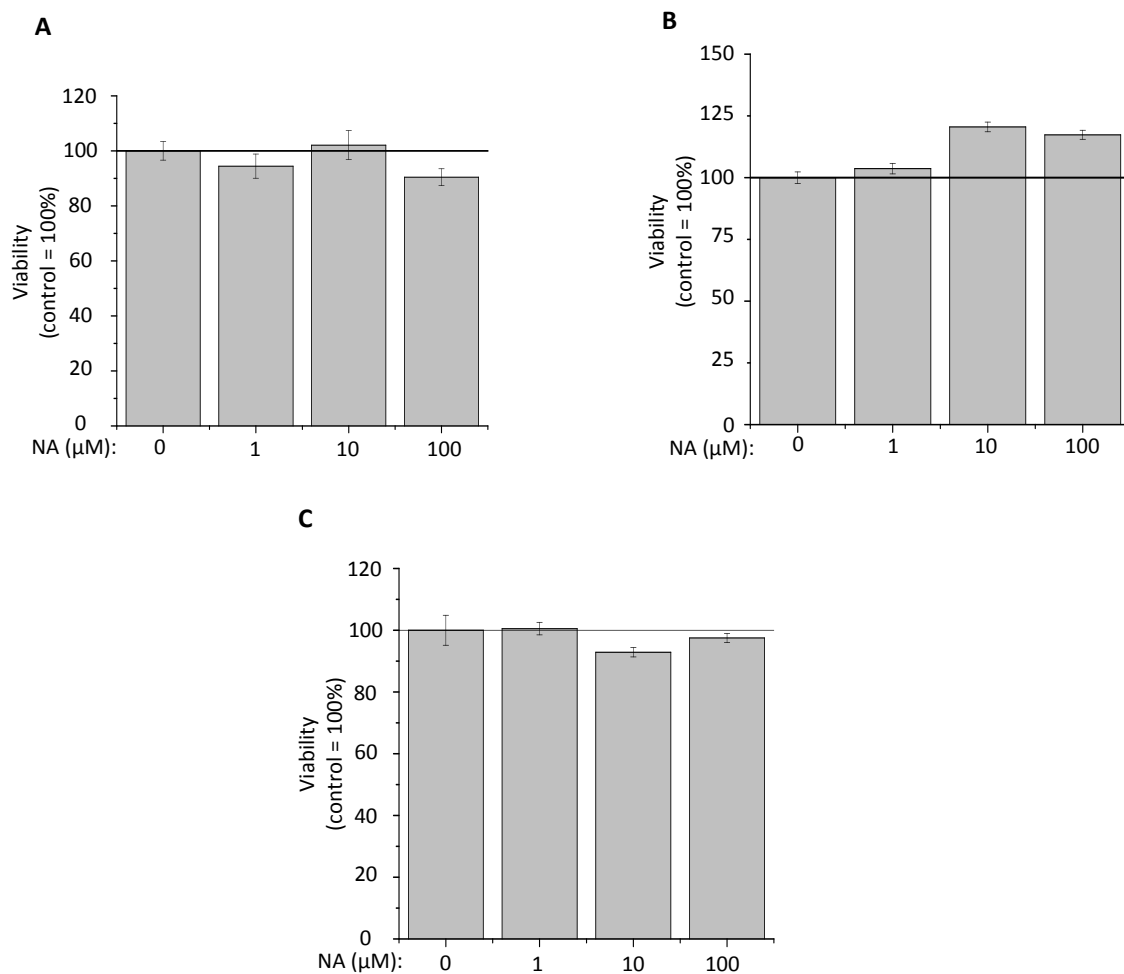

**Supplementary Figure S1** Up to 100  $\mu$ M, NA does not influence viability of human sebocytes

MTT-assays. Viability of SZ95 sebocytes was monitored following 24- (**A**), 48- (**B**), and 72-hr (**C**) treatments. Results are expressed in the percentage of the vehicle control (100%, solid line) as mean $\pm$ SEM of four independent determinations. Two additional experiments yielded similar results.

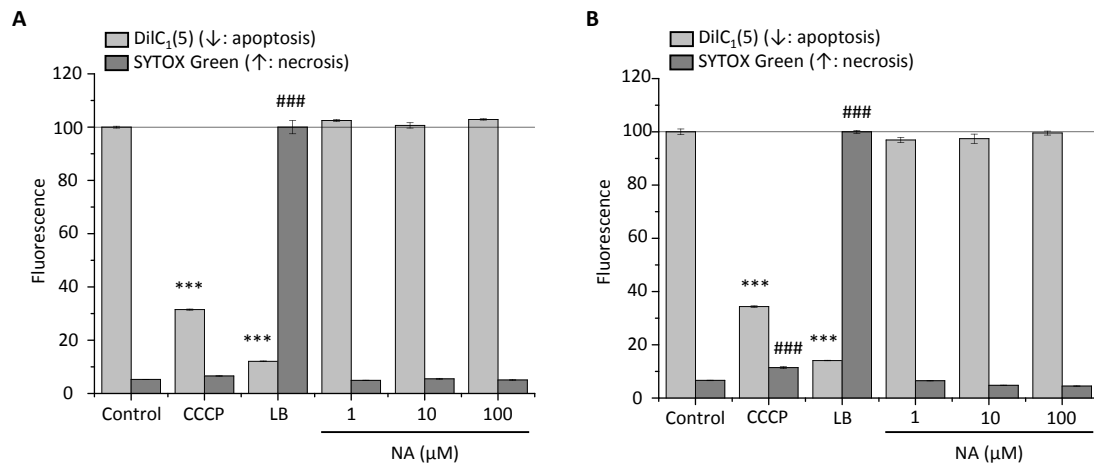

**Supplementary Figure S2** Up to 100  $\mu$ M, NA can be applied without the risk of cytotoxicity

Combined fluorescent DilC<sub>1</sub>(5)-SYTOX Green labeling. To monitor apoptotic and necrotic cell death, SZ95 sebocytes were treated as indicated for 24 (**A**) or 48 (**B**) hours. Results are expressed in the percentage of the vehicle control (100%, solid line; DilC<sub>1</sub>(5) apoptosis data) or in the percentage of the positive control (100%, solid line; SYTOX Green necrosis data) as mean $\pm$ SEM of four independent determinations. Two additional experiments yielded similar results. \*\*\* and ### mark significant ( $P < 0.001$  in both cases) differences compared to the vehicle control group. **CCCP**: carbonyl cyanide m-chlorophenyl hydrazone (1:200; apoptosis positive control); **LB**: lysis buffer (1:100; positive control for necrosis); **NA**: nicotinic acid.

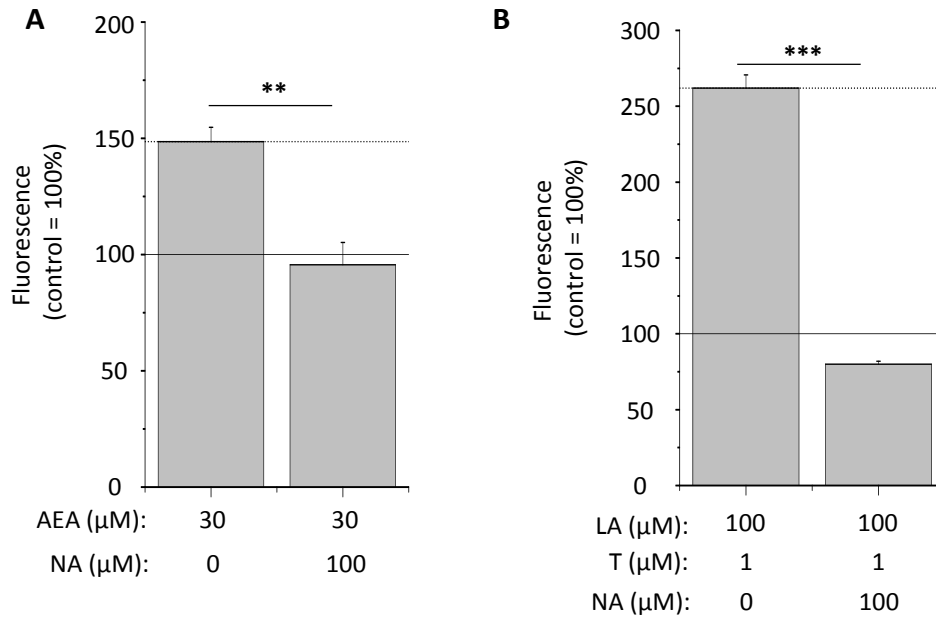

**Supplementary Figure S3** *NA exerts universal lipostatic effects*

Nile Red assay. Lipostatic efficiency of NA was assessed following 48-hr treatments in the presence of AEA (**A**) or LA+T combination (**B**). Results are expressed in the percentage of the vehicle control (100%, solid line) as mean±SEM of four independent determinations. One additional experiment yielded similar results. \*\* and \*\*\* mark significant ( $P<0.01$  and  $0.001$ , respectively) differences, as indicated. **AEA**: anandamide; **LA**: linoleic acid; **NA**: nicotinic acid; **T**: testosterone.

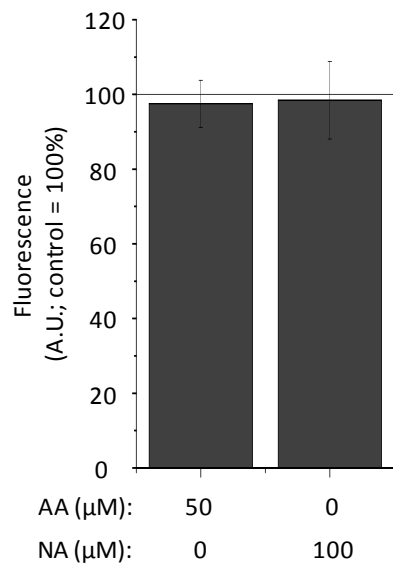

**Supplementary Figure S4** *Neither AA, nor NA influence HCA<sub>2</sub> expression in human sebocytes*

Immunofluorescent labeling. HCA<sub>2</sub> expression was assessed following the indicated 24-hr treatments. Following appropriate background subtraction (for details, see the **Materials and methods** section) data of the green channel were expressed in the percentage of the vehicle control, and presented as mean±SEM of N=15-16 cells in each group. **A.U.:** arbitrary units.
